# Supplementary material
Source: Research Square preprint supplement (doi:10.21203/rs.3.rs-8358162/v1)
Supplement: Supplementary file 1 [file 2a5154691b0e41871af27c70.docx]

**Supplement table The elements of behavioral change based on the BCW theory**

| **COM-B** **component** | **Barrier (B) or facilitator (F)** | **Intervention**  **goals** | **Intervention**  **function** | **Behavior change techniques（BCTs）** | **Policy categories** |
| --- | --- | --- | --- | --- | --- |
| Psychological  capability | Lack of sexual health knowledge and skills(F) | Providing sex-related professional knowledge, skills, and continuous knowledge acquisition | Education  Training | Provides information on health benefits,  Behavioral exercises | Communication/Marketing,  Guidelines |
| Physical  capability | Characteristic attraction and favorable feelings（F） | Correctly understanding attractiveness | Training Enablement | behavioral demonstration,  Self-monitoring | Guidelines, Service provision |
| Automatic motivation | Sensation seeking and impulsivity（F）  Maintenance of "intimate relationships "（F） | Identifying sexual impulses and coping strategies；and establishing and maintaining normal intimate relationships | Persuasion Training  Modeling | verbal persuasion,  Behavioral exercises and demonstrations | Communication/Marketing,  Guidelines,  Regulation |
| Reflective motivation | Reflection and sense of responsibility（B） | Enhancing the ability to judge risky sexual behaviors and reflect on their adverse consequences | Incentivization Education | Incentivization,  Provide information on health outcomes | Communication/Marketing,  Guidelines |
| Physical opportunity | Risky situations（F） | Learning to assess and identify sexual risk factors, sudden sexual situations, and corresponding handling methods | Restriction Training | Outcome goal setting,  Behavioral exercises | Legislation, Guidelines |
| Social opportunity | Limited access to resources and services（F）  Regular sexual partners and interpersonal support（B） | Providing sexual health service resources; and strengthening peer and interpersonal support | Environmental restructuring, Enablement | rebuilding the social environment,  Imagine success. | Environmental/  social planning, Service provision |
